# Supplementary material for: A shock tube laser schlieren study of methyl acetate dissociation in the fall-off regime
Source: Royal Society of Chemistry journal article supplement (doi:10.1039/c3cp55297g), 2014-01-01
Supplement: c3cp55297g1.pdf [file c3cp55297g1.pdf]

**Table S1.** Initial and reaction conditions for the LS experiments and experimental  $k_1$ .

| $P_1 /$<br>Torr       | $T_1 /$<br>°C | $P_2 /$<br>Torr | $T_2 /$<br>K | $k_1 /$<br>s <sup>-1</sup> |
|-----------------------|---------------|-----------------|--------------|----------------------------|
| <b>2% MA 120 Torr</b> |               |                 |              |                            |
| 5.4                   | 21.4          | 124             | 1704         | 41124.01                   |
| 5.85                  | 21.4          | 119             | 1550         | 12233.58                   |
| 6.15                  | 21.4          | 121             | 1510         | 8008.485                   |
| 5.11                  | 20.8          | 126             | 1797         | 122213.5                   |
| 4.9                   | 20.8          | 122             | 1814         | 177321.6                   |
| 4.75                  | 20.8          | 125             | 1896         | 166306.7                   |
| 4.75                  | 20.8          | 126             | 1909         | 288720.5                   |
| 4.9                   | 21.1          | 126             | 1862         | 179032.2                   |
| 4.9                   | 21.1          | 126             | 1863         | 180385.8                   |
| 4.65                  | 21            | 127             | 1962         | 325480.9                   |
| 4.5                   | 21            | 123             | 1959         | 253689.1                   |
| 4.25                  | 21            | 120             | 2020         | 365638.8                   |
| 4.05                  | 21            | 120             | 2090         | 530668.9                   |
| 4.1                   | 21            | 121             | 2088         | 447180.3                   |
| <b>4% MA 120 Torr</b> |               |                 |              |                            |
| $P_1 /$<br>Torr       | $T_1 /$<br>°C | $P_2 /$<br>Torr | $T_2 /$<br>K | $k_1 /$<br>s <sup>-1</sup> |
| 5.8                   | 20.6          | 129             | 1492         | 4284.935                   |
| 5.4                   | 20.6          | 129             | 1574         | 11848.71                   |
| 5                     | 20.6          | 124             | 1622         | 18977.71                   |
| 4.8                   | 20.6          | 120             | 1632         | 18988.05                   |
| 5.1                   | 20.6          | 121             | 1567         | 10829.34                   |
| 5.25                  | 20.6          | 122             | 1539         | 8086.15                    |
| 4.55                  | 20.6          | 121             | 1703         | 44869.4                    |
| 4.7                   | 20.6          | 119             | 1648         | 30421.67                   |
| 4.8                   | 20.3          | 123             | 1660         | 25959.87                   |
| 4.6                   | 20.3          | 123             | 1714         | 50968.47                   |
| 4.45                  | 20.7          | 122             | 1746         | 61713.97                   |
| 4.5                   | 20.6          | 124             | 1753         | 52296.95                   |
| 4.3                   | 20.6          | 121             | 1790         | 81504.36                   |
| 4.15                  | 20.6          | 120             | 1819         | 103880.5                   |
| 4.05                  | 20.6          | 118             | 1831         | 122613.6                   |
| 4.05                  | 20.6          | 118             | 1815         | 126569.5                   |
| 4.1                   | 20.6          | 120             | 1838         | 163163.9                   |
| 4.1                   | 20.6          | 121             | 1851         | 133830.5                   |
| 4.05                  | 20.6          | 124             | 1901         | 243353.8                   |

| $P_1 /$<br>Torr      | $T_1 /$<br>°C | $P_2 /$<br>Torr | $T_2 /$<br>K | $k_1 /$<br>s <sup>-1</sup> |
|----------------------|---------------|-----------------|--------------|----------------------------|
| <b>2% MA 60 Torr</b> |               |                 |              |                            |
| 2                    | 21            | 62              | 2188         | 439208.6                   |
| 1.8                  | 21            | 58              | 2262         | 514201                     |
| 2.1                  | 21            | 63              | 2113         | 401778.7                   |
| 2.2                  | 21.1          | 65              | 2082         | 437149.7                   |
| 2.25                 | 21.1          | 65              | 2052         | 376440.2                   |
| 2.25                 | 21.1          | 64              | 2030         | 335510.3                   |
| 2.3                  | 21.1          | 64              | 1979         | 224716.1                   |
| 2.35                 | 21.1          | 64              | 1947         | 207769                     |
| 2.4                  | 21.2          | 64              | 1922         | 157895.3                   |
| 2.45                 | 21.2          | 64              | 1892         | 115078.4                   |
| 2.55                 | 21.2          | 64              | 1834         | 95006.6                    |
| 2.6                  | 21.2          | 64              | 1796         | 70250.28                   |
| 2.65                 | 21.2          | 64              | 1777         | 53403.82                   |
| 2.75                 | 21.2          | 63              | 1704         | 43494.68                   |
| 2.9                  | 21.3          | 63              | 1639         | 18872.89                   |

| $P_1 /$<br>Torr      | $T_1 /$<br>°C | $P_2 /$<br>Torr | $T_2 /$<br>K | $k_1 /$<br>s <sup>-1</sup> |
|----------------------|---------------|-----------------|--------------|----------------------------|
| <b>4% MA 60 Torr</b> |               |                 |              |                            |
| 2.3                  | 20.7          | 63              | 1743         | 55944.09                   |
| 2.15                 | 20.7          | 62              | 1811         | 79341.19                   |
| 2.35                 | 20.7          | 62              | 1704         | 30791.87                   |
| 2.15                 | 20.7          | 61              | 1789         | 59085.39                   |
| 2.05                 | 20.9          | 60              | 1847         | 117636.3                   |
| 2.05                 | 20.9          | 60              | 1839         | 156434.2                   |
| 2.1                  | 20.9          | 63              | 1888         | 158115.6                   |
| 2.05                 | 20.9          | 63              | 1915         | 189850.3                   |
| 2                    | 20.9          | 62              | 1922         | 280782                     |
| 1.9                  | 20.9          | 59              | 1924         | 271659.1                   |
| 1.85                 | 20.9          | 62              | 2037         | 438364.2                   |
| 1.95                 | 20.9          | 62              | 1968         | 236210.9                   |
| 1.9                  | 20.9          | 63              | 2041         | 398985.9                   |
| 1.8                  | 20.9          | 60              | 2042         | 401076.9                   |
| 1.75                 | 20.9          | 61              | 2113         | 505809.4                   |
| 1.7                  | 20.9          | 60              | 2143         | 648421                     |

**Table S2.** Arrhenius parameters calculated from RRKM/ME for dissociation of methyl acetate .

|                                     | Pressure (atm) | A / s    | n      | Ea/R     |
|-------------------------------------|----------------|----------|--------|----------|
| <b>MA &lt;=&gt; CH3 + CH3 + CO2</b> |                |          |        |          |
|                                     | 3.95E-02       | 6.59E+82 | -19.52 | 6.08E+04 |
|                                     | 7.89E-02       | 3.71E+82 | -19.34 | 6.13E+04 |
|                                     | 1.58E-01       | 9.06E+81 | -19.07 | 6.16E+04 |
|                                     | 3.16E-01       | 8.45E+80 | -18.68 | 6.19E+04 |
|                                     | 5.00E-01       | 9.67E+79 | -18.35 | 6.19E+04 |
|                                     | 1.00E+00       | 1.35E+78 | -17.74 | 6.18E+04 |
|                                     | 1.50E+00       | 6.11E+76 | -17.31 | 6.17E+04 |
|                                     | 2.50E+00       | 6.40E+74 | -16.69 | 6.14E+04 |
|                                     | 5.00E+00       | 3.92E+71 | -15.71 | 6.07E+04 |
|                                     | 1.00E+01       | 6.12E+67 | -14.57 | 5.98E+04 |

|                                  | Pressure (atm) | A / s    | n      | Ea/R     |
|----------------------------------|----------------|----------|--------|----------|
| <b>MA &lt;=&gt; CH3OCO + CH3</b> |                |          |        |          |
|                                  | 3.95E-02       | 1.47E+82 | -19.58 | 6.26E+04 |
|                                  | 7.89E-02       | 4.24E+82 | -19.58 | 6.33E+04 |
|                                  | 1.58E-01       | 5.39E+82 | -19.48 | 6.40E+04 |
|                                  | 3.16E-01       | 2.70E+82 | -19.28 | 6.45E+04 |
|                                  | 5.00E-01       | 9.56E+81 | -19.07 | 6.48E+04 |
|                                  | 1.00E+00       | 7.41E+80 | -18.64 | 6.51E+04 |
|                                  | 1.50E+00       | 9.05E+79 | -18.32 | 6.51E+04 |
|                                  | 2.50E+00       | 3.20E+78 | -17.84 | 6.51E+04 |
|                                  | 5.00E+00       | 9.12E+75 | -17.02 | 6.48E+04 |
|                                  | 1.00E+01       | 5.28E+72 | -16.02 | 6.42E+04 |

|                                   | Pressure (atm) | A / s    | n      | Ea/R     |
|-----------------------------------|----------------|----------|--------|----------|
| <b>MA &lt;=&gt; CH3OH + CH2CO</b> |                |          |        |          |
|                                   | 3.95E-02       | 2.90E+75 | -17.93 | 5.59E+04 |
|                                   | 7.89E-02       | 1.64E+74 | -17.5  | 5.59E+04 |
|                                   | 1.58E-01       | 3.72E+72 | -16.97 | 5.58E+04 |
|                                   | 3.16E-01       | 3.10E+70 | -16.31 | 5.56E+04 |
|                                   | 5.00E-01       | 7.15E+68 | -15.8  | 5.53E+04 |
|                                   | 1.00E+00       | 9.49E+65 | -14.93 | 5.47E+04 |
|                                   | 1.50E+00       | 1.15E+64 | -14.35 | 5.43E+04 |
|                                   | 2.50E+00       | 2.54E+61 | -13.56 | 5.36E+04 |
|                                   | 5.00E+00       | 2.42E+57 | -12.38 | 5.25E+04 |
|                                   | 1.00E+01       | 8.51E+52 | -11.08 | 5.12E+04 |

|                   | Pressure (atm) | A / s    | n      | Ea/R     |
|-------------------|----------------|----------|--------|----------|
| MA <=> CH2COHOCH3 |                |          |        |          |
|                   | 3.95E-02       | 3.90E+72 | -17.26 | 5.40E+04 |
|                   | 7.89E-02       | 1.21E+71 | -16.76 | 5.40E+04 |
|                   | 1.58E-01       | 1.52E+69 | -16.16 | 5.37E+04 |
|                   | 3.16E-01       | 7.17E+66 | -15.45 | 5.33E+04 |
|                   | 5.00E-01       | 1.16E+65 | -14.9  | 5.30E+04 |
|                   | 1.00E+00       | 9.59E+61 | -13.98 | 5.23E+04 |
|                   | 1.50E+00       | 9.25E+59 | -13.38 | 5.17E+04 |
|                   | 2.50E+00       | 1.62E+57 | -12.57 | 5.10E+04 |
|                   | 5.00E+00       | 1.28E+53 | -11.37 | 4.98E+04 |
|                   | 1.00E+01       | 4.37E+48 | -10.07 | 4.85E+04 |
